# Supplementary material
Source: ML conference proceedings conference paper supplement (https://proceedings.neurips.cc/paper_files/paper/2011/hash/a516a87cfcaef229b342c437fe2b95f7-Abstract.html)
Supplement: Supplementary file 1 [file a516a87cfcaef229b342c437fe2b95f7-Supplemental.zip]

# Clustered Multi-Task Learning Via Alternating Structure Optimization: Supplemental Material

## A. Algorithm Details

### Alternating Optimization Method

---

**Algorithm 1** Alternating Optimization Algorithm (altCMTL) for Convex CMTL

---

- 1: **Input:**  $W_0, \gamma_0 \in \mathbb{R}$ , and max iteration number  $q$ .
  - 2: **Output:**  $M, W$ .
  - 3: **for**  $i = 1$  to  $q$  **do**
  - 4:     Update  $M_i$  by solving Eq. (20).
  - 5:     Update  $W_i$  by solving Eq. (19).
  - 6:     **if** stopping criteria satisfied **then** break the for loop.
  - 7: **end-for**
  - 8: Set  $M = M_{i+1}, W = W_{i+1}$ .
- 

### Accelerated Projected Gradient Method

---

**Algorithm 2** Accelerated Projected Gradient Algorithm (apgCMTL) for Convex CMTL

---

- 1: **Input:**  $Z_0, \gamma_0 \in \mathbb{R}$ , and max iteration number  $q$ .
  - 2: **Output:**  $Z$ .
  - 3: Set  $Z_1 = Z_0, t_{-1} = 0$ , and  $t_0 = 1$ .
  - 4: **for**  $i = 1$  to  $q$  **do**
  - 5:     Set  $\mu_i = (t_{i-2} - 1)/t_{i-1}, S_i = Z_i + \mu_i(Z_i - Z_{i-1})$ .
  - 6:     **while** (**true**)
  - 7:         Compute  $Z^* = \operatorname{argmin}_{Z \in \mathcal{C}} \mathcal{M}_{\gamma, S}(Z)$ .
  - 8:         **if**  $f(Z^*) \leq \mathcal{M}_{\gamma, S_i}(Z^*)$  **then** break the while loop
  - 9:         **else** set  $\gamma_i = \gamma_i \times 2$ .
  - 10:     **end-if**
  - 11:     **end-while**
  - 12:     Set  $Z_{i+1} = Z^*$  and  $\gamma_{i+1} = \gamma_i$ .
  - 13:     **if** stopping criteria satisfied **then** break the for loop.
  - 14:     Set  $t_i = \frac{1 + \sqrt{1 + 4t_{i-1}^2}}{2}$ .
  - 15: **end-for**
  - 16: Set  $Z = Z_{i+1}$ .
- 

The optimization problem in Eq. (23) admits an analytical solution via solving a simple convex projection problem. The main result is summarized in the following theorem.

**Theorem 6.1.** *Given an arbitrary symmetric matrix  $\hat{M}_S \in \mathbb{R}^{m \times m}$  in Eq. (23), let  $\hat{M}_S = P\hat{\Sigma}P^T$  be its eigen-decomposition, where  $P \in \mathbb{R}^{m \times m}$  is orthogonal, and  $\hat{\Sigma} = \operatorname{diag}(\hat{\sigma}_1, \dots, \hat{\sigma}_m) \in \mathbb{R}^{m \times m}$  is diagonal with the eigenvalues on its main diagonal. Let  $\Sigma^* = \operatorname{diag}(\sigma_1^*, \dots, \sigma_m^*) \in \mathbb{R}^{m \times m}$ , where  $\{\sigma_i^*\}_{i=1}^m$  is the optimal solution to the following optimization problem:*

$$\min_{\{\sigma_i\}} \sum_{i=1}^m (\sigma_i - \hat{\sigma}_i)^2, \quad \text{s.t.} \quad \sum_{i=1}^m \sigma_i = k, \quad 0 \leq \sigma_i \leq 1, \quad i = 1, \dots, m. \quad (25)$$

Then the global minimizer to Eq. (23) is given by  $M^* = P\Sigma^*P^T$ .

To prove the above theorem, we first introduce the following lemma:

**Lemma 6.2.** *Let  $O_{(1)}$  be the optimal objective value of the optimization problem:*

$$\min_T \|T - E\|_F^2, \quad \text{s.t.} \quad \operatorname{tr}(T) = k, \quad 0 \preceq T \preceq I, \quad (26)$$

and let  $O_{(2)}$  be the optimal objective value of the optimization problem:

$$\min_{\hat{E}} \|\hat{E} - E\|_F^2, \quad \text{s.t.} \quad \text{tr}(\hat{E}) = k, \hat{E} = \text{diag}(\hat{e}_1, \dots, \hat{e}_d), 0 \leq \hat{e}_i \leq 1. \quad (27)$$

Then  $O_{(1)} = O_{(2)}$ .

*Proof.* According to the definition, the feasible domain of optimization (27) is a subset of the feasible domain of optimization (26), which indicates  $O_{(2)} \geq O_{(1)}$ . Let  $T^*$  be the optimal solution to the optimization (26), and  $\hat{T} = \text{diag}(T^*)$  be the diagonal matrix by setting the non-diagonal elements of  $T^*$  to 0. It is evident that  $\text{tr}(\hat{T}) = k$  and  $0 \preceq \hat{T} \preceq I$  hold. Notice that  $\hat{T}$  is a feasible point in optimization (27), we have following inequality:

$$O_{(1)} = \|T^* - E\|_F^2 \geq \|\hat{T} - E\|_F^2 \geq O_{(2)}, \quad O_{(1)} \geq O_{(2)}. \quad (28)$$

Therefore  $O_{(1)} = O_{(2)}$  must hold. This completes the proof.  $\square$

We are now ready to prove Theorem 6.1:

*Proof of Theorem 6.1.* For an arbitrary  $M_Z$  feasible for Eq. (23), we denote its eigen-decomposition by  $M_Z = Q\Lambda Q^T$ , where  $Q \in \mathbb{R}^{m \times m}$  is orthogonal,  $\Lambda = \text{diag}(\lambda_1, \dots, \lambda_m) \in \mathbb{R}^{m \times m}$  is diagonal with the eigenvalues on its main diagonal. Because of the unitary invariant property of Frobenius norm, the optimization in Eq. (23) can be equivalently represented as:

$$\begin{aligned} \min_{\Lambda, Q} \quad & \left\| P^T Q \Lambda Q^T P - \hat{\Sigma} \right\|_F^2, \\ \text{s.t.} \quad & \text{tr}(\Lambda) = k, \Lambda = \text{diag}(\lambda_1, \dots, \lambda_m), 0 \leq \lambda_i \leq 1, \quad Q^T Q = Q Q^T = I_m. \end{aligned} \quad (29)$$

According to Lemma 6.2, the optimization problems in Eq. (29) and Eq. (25) have the same optimal objective value. It is easy to verify that the optimization problem in Eq. (29) is strictly convex, and that the pair  $\Lambda = \Sigma^*, Q = P$  is a feasible solution. This means that  $\Lambda = \Sigma^*, Q = P$  is the unique global minimizer to Eq. (29). Thus  $M^* = P \Sigma^* P^T$  is the unique global minimizer to Eq. (23).  $\square$

## Direct Gradient Descent Method

---

### Algorithm 3 Direct Gradient Descent Algorithm (graCMTL) for Convex CMTL

---

- 1: **Input:**  $W_0, \gamma_0 \in \mathbb{R}$ , and max iteration number  $q$ .
  - 2: **Output:**  $M, W$ .
  - 3: **for**  $i = 1$  to  $q$  **do**
  - 4:   Compute  $M_t^*$  by solving Eq. (20) using  $W_{t-1}$ .
  - 5:   Compute the gradient direction  $\nabla_{W} g_{\text{CMTL}}(W_{t-1}) = 2(\eta I + M_t^*)^{-1} W_{t-1}^T$ .
  - 6:   Perform a line search to determine  $L_t$ .
  - 7:    $W_t = W_{t-1} + L_t \nabla_{W} g_{\text{CMTL}}(W_{t-1})$ .
  - 8:   **if** stopping criteria satisfied **then** break the for loop.
  - 9: **end-for**
  - 10: Set  $M = M_{i+1}, W = W_{i+1}$ .
- 

## B. Construction of Synthetic Cluster-Structured Data

Denote by  $\hat{w}_i^c$  the  $i$ -th task from the  $c$ -th cluster.  $\hat{w}_i^c$  can be expressed as the sum of the cluster center  $w^c$  and the task-specific component  $w_i^c$ , i.e.,  $\hat{w}_i^c = w^c + w_i^c$ . The cluster center  $w^c$  is generated as follows: (1) set the value of the first 20 entries in  $w^c$  as zero; (2) select  $(d - 20)/5$  entries from the other  $d - 20$  entries, and generate non-zero values from  $\mathcal{N}(0, 900)$  for the selected  $(d - 20)/5$  entries. Note that we keep  $w^c$  orthogonal to the other cluster centers by selecting the appropriate locations of the non-zero entries. The task-specific component  $w_i^c$  is generated as follows: (1) generate non-zero values from  $\mathcal{N}(0, 16)$  for the first 20 entries; (2) generate non-zero values from  $\mathcal{N}(0, 16)$  for the locations corresponding to the non-zero entries of  $w^c$ . For each task we generate 60 sample pairs

(the data point and the response). Denote the data matrix and the response vector by  $X_i$  and  $y_i$ , respectively. The entries in  $X_i$  are generated from  $\mathcal{N}(0, 1)$ , and the entries in  $y_i$  are generated as  $y_i = X_i w_i^c + \xi_i$ , where  $\xi \sim \mathcal{N}(0, 0.1)$  represents the noise vector.

### C. Effectiveness Comparison on Sarcos Dataset

The Sarcos data is collected for an inverse dynamics prediction problem for a seven degrees-of-freedom anthropomorphic robot arm. This data consists of 48933 observations corresponding to 7 joint torques; each of the observations is described by 21 features including 7 joint positions, 7 joint velocities, and 7 joint accelerations. The prediction of each joint torque corresponds to one task. Because using a few training samples already gives good performance, we vary the training sample size in the set  $\{10, 20, 50, 100\}$ . The results are presented in Table 2. We can observe (1) when the training sample size is relatively small, cCMTL outperforms other competing methods; (2) when the training ratio is large, cCMTL and RidgeSTL are comparable; (3) RegMTL performs poorly in all settings.

Table 2: Performance comparison on the Sarcos data in terms of nMSE and aMSE. Smaller nMSE and aMSE indicate better performance. The regularization parameters of all methods are tuned using 5-fold cross validation. The mean and standard deviation are calculated based on 10 random repetitions.

| Measure | Sample | RidgeSTL            | RegMTL              | cCMTL               |
|---------|--------|---------------------|---------------------|---------------------|
| nMSE    | 10     | $2.3668 \pm 0.3033$ | $2.2310 \pm 0.5008$ | $2.1984 \pm 1.0083$ |
|         | 20     | $0.7409 \pm 0.1461$ | $0.8787 \pm 0.2007$ | $0.6710 \pm 0.0740$ |
|         | 50     | $0.2562 \pm 0.0366$ | $0.4387 \pm 0.0509$ | $0.2522 \pm 0.0258$ |
|         | 100    | $0.1735 \pm 0.0068$ | $0.3717 \pm 0.0411$ | $0.1784 \pm 0.0097$ |
| aMSE    | 10     | $0.9151 \pm 0.0718$ | $0.9399 \pm 0.1622$ | $1.0803 \pm 0.6384$ |
|         | 20     | $0.4129 \pm 0.0976$ | $0.4796 \pm 0.1267$ | $0.3703 \pm 0.0427$ |
|         | 50     | $0.1457 \pm 0.0259$ | $0.2581 \pm 0.0374$ | $0.1432 \pm 0.0198$ |
|         | 100    | $0.0992 \pm 0.0031$ | $0.2133 \pm 0.0242$ | $0.1014 \pm 0.0041$ |
